# Supplementary material for: 2-Pentadecyl-2-oxazoline ameliorates memory impairment and depression-like behaviour in neuropathic mice: possible role of adrenergic alpha2- and H3 histamine autoreceptors
Source: PubMed Central journal article supplement (PMC7871413; doi:10.1186/s13041-020-00724-z), 2021-02-08

**A**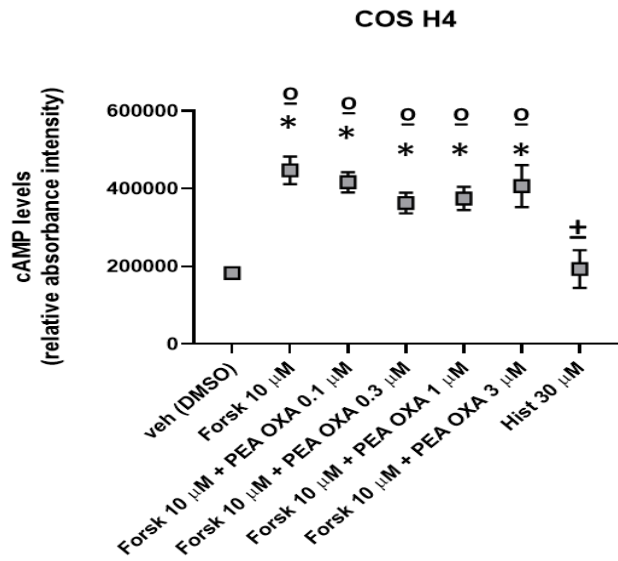**B**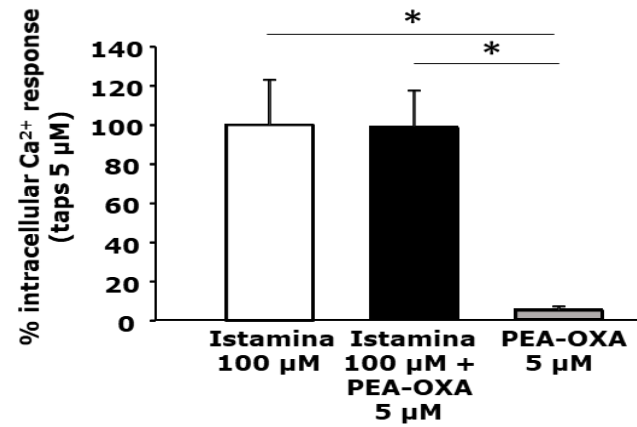**C**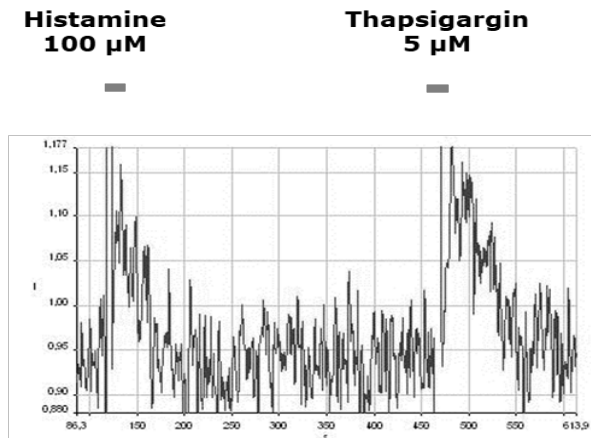**D**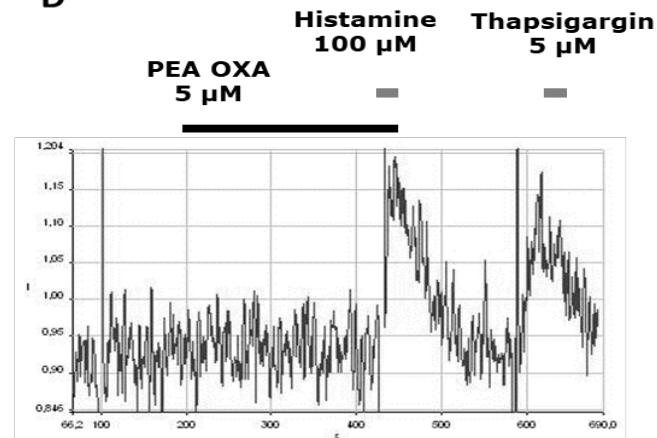

Supplement: 13041_2020_724_MOESM2_ESM.pdf [file 13041_2020_724_MOESM2_ESM.pdf]
